# Supplementary material
Source: PubMed Central journal article supplement (PMC6909251)
Supplement: NIHMS1543416-supplement-9.pdf [file NIHMS1543416-supplement-9.pdf]

|                  | Brain   | Heart   | Lung    | Liver   | Kidney  | Spleen  | Pancreas | Bone Marrow |
|------------------|---------|---------|---------|---------|---------|---------|----------|-------------|
| Control vs. NP-1 | >0.9999 | 0.0964  | 0.0003  | 0.9374  | 0.0458  | 0.0396  | >0.9999  | <0.0001     |
| Control vs. NP-2 | 0.0877  | >0.9999 | >0.9999 | >0.9999 | 0.5878  | 0.0010  | 0.6350   | 0.0674      |
| Control vs. NP-3 | 0.0683  | >0.9999 | >0.9999 | >0.9999 | >0.9999 | 0.0140  | >0.9999  | 0.0178      |
| Control vs. NP-4 | >0.9999 | >0.9999 | >0.9999 | 0.0025  | >0.9999 | 0.0011  | 0.1315   | 0.0520      |
| NP-1 vs. NP-2    | 0.4579  | 0.4471  | 0.0008  | >0.9999 | >0.9999 | 0.0355  | >0.9999  | <0.0001     |
| NP-1 vs. NP-3    | 0.3553  | 0.0797  | 0.0005  | >0.9999 | 0.2118  | 0.7811  | >0.9999  | <0.0001     |
| NP-1 vs. NP-4    | >0.9999 | 0.2791  | 0.0004  | 0.0433  | 0.8004  | 0.0400  | 0.7541   | <0.0001     |
| NP-2 vs. NP-3    | >0.9999 | >0.9999 | >0.9999 | >0.9999 | >0.9999 | 0.9774  | >0.9999  | >0.9999     |
| NP-2 vs. NP-4    | 0.4035  | >0.9999 | >0.9999 | 0.0249  | >0.9999 | >0.9999 | >0.9999  | >0.9999     |
| NP-3 vs. NP-4    | 0.3129  | >0.9999 | >0.9999 | 0.0111  | >0.9999 | >0.9999 | 0.5091   | >0.9999     |
