# Supplementary material
Source: PubMed Central journal article supplement (PMC6909251)
Supplement: NIHMS1543416-supplement-13.pdf [file NIHMS1543416-supplement-13.pdf]

|                  |         |
|------------------|---------|
|                  | CD117*  |
| Control vs. NP-1 | <0.0001 |
| Control vs. NP-2 | <0.0001 |
| Control vs. NP-3 | <0.0001 |
| Control vs. NP-4 | 0.0001  |
| NP-1 vs. NP-2    | <0.0001 |
| NP-1 vs. NP-3    | <0.0001 |
| NP-1 vs. NP-4    | <0.0001 |
| NP-2 vs. NP-3    | >0.9999 |
| NP-2 vs. NP-4    | >0.9999 |
| NP-3 vs. NP-4    | >0.9999 |
